# Supplementary material for: Whole-Brain Connectome of GABAergic Neurons in the Mouse Zona Incerta
Source: Springer Nature journal article supplement (doi:10.1007/s12264-022-00930-w), 2022-08-19
Supplement: MOESM1 [file 12264_2022_930_MOESM1_ESM.pdf]

## Supplemental Figures and Figure Legends

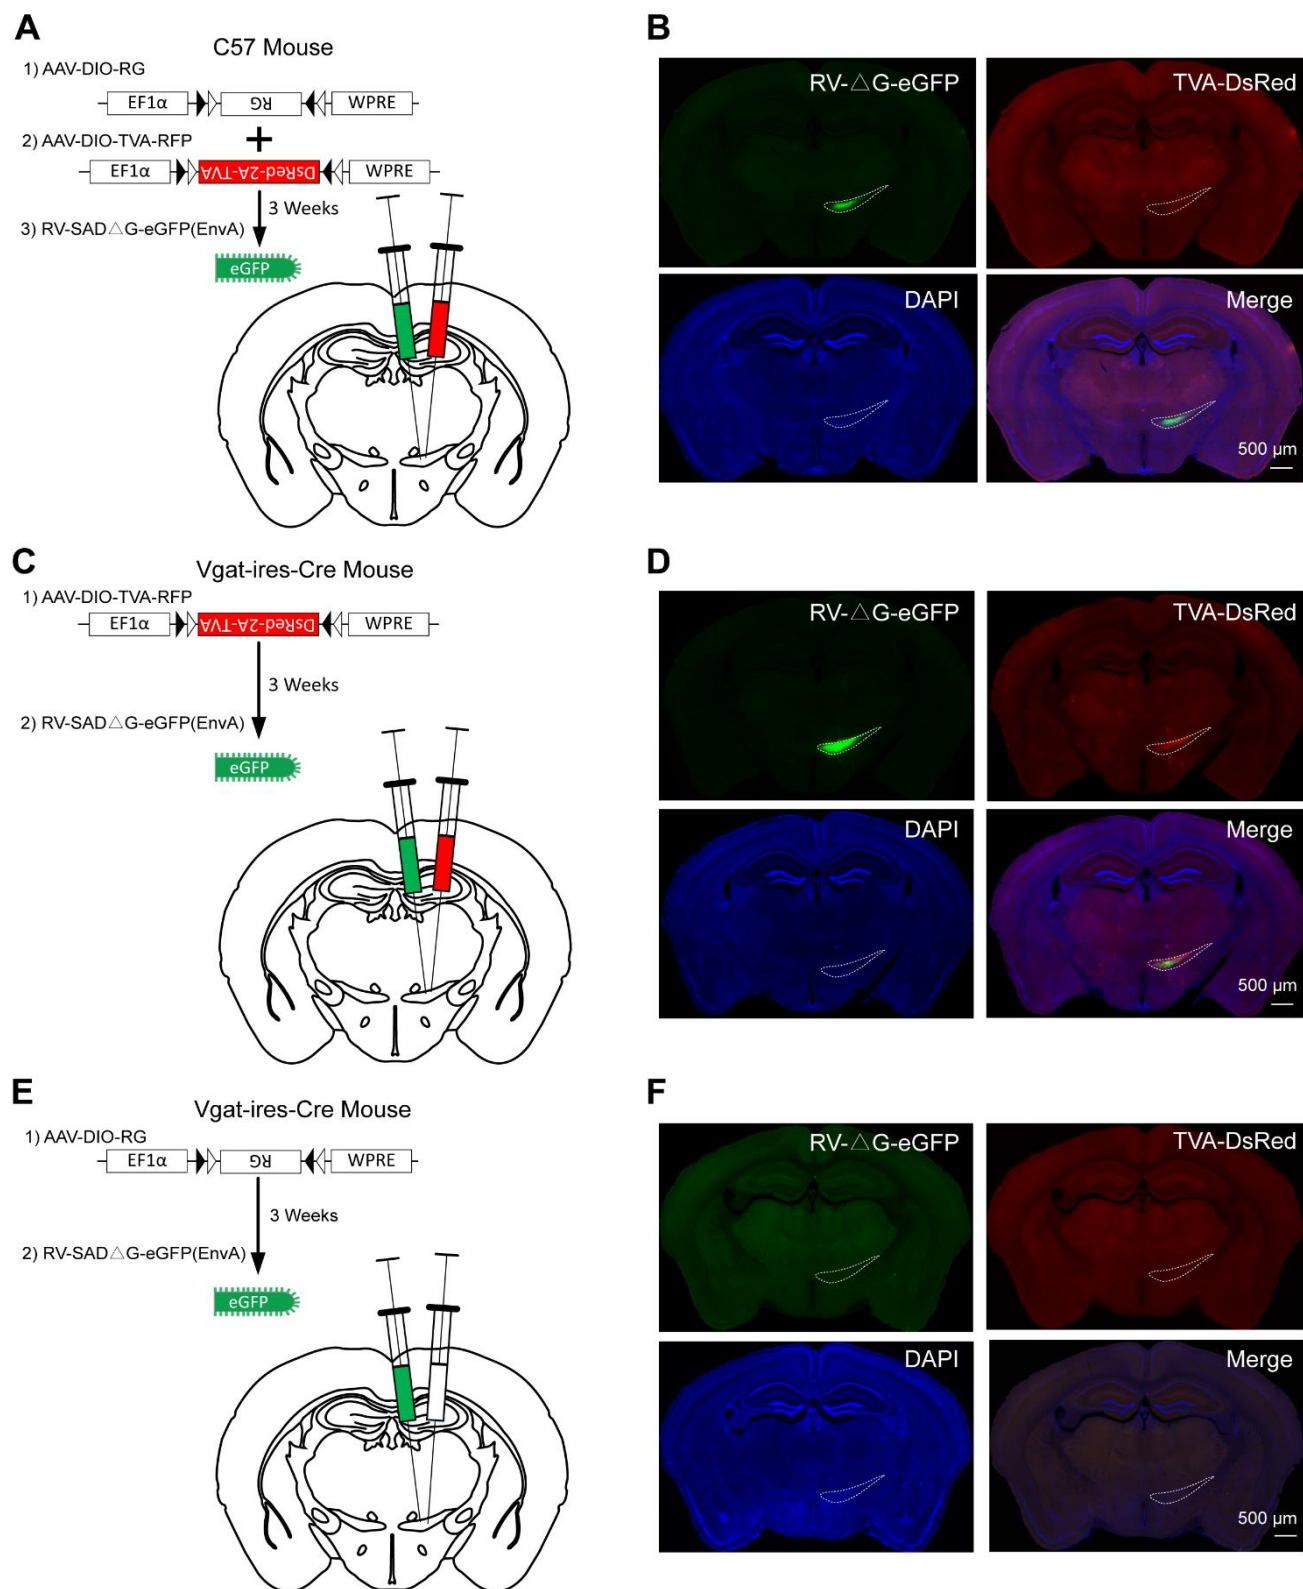

**Fig. S1** The RV monosynaptic retrograde tracing strategy is reliable. **A** AAV9-EF1 $\alpha$ -DIO-RG (1) and AAV9-EF1 $\alpha$ -DIO-DsRed-TVA (2) is injected into wild-type mice, and three weeks later RV-SAD-

$\Delta$ G-eGFP (EnvA) (3) is injected into the same ZI sector. **B** eGFP-positive cells in the ZI are all near the injection site. This verifies that the monosynaptic retrograde tracing strategy is Cre-dependent. Scale bar, 500  $\mu$ m. **C** AAV9-EF1 $\alpha$ -DIO-DsRed -TVA (1) is injected into Vgat-Cre mice, and three weeks later RV-SAD- $\Delta$ G-eGFP (EnvA) (2) is injected into the same ZI sector. **D** eGFP- and DsRed-positive cells in ZI, and no eGFP-positive cells outside the injection site. This verifies that the monosynaptic retrograde tracing strategy is RG-dependent. Without RG, RV could not spread retrogradely to presynaptic neurons. Scale bar, 500  $\mu$ m. **E** AAV9-EF1 $\alpha$ -DIO-RG (1) is injected into Vgat-Cre mice, and three weeks later RV-SAD- $\Delta$ G-eGFP (EnvA) (2) is injected into the same ZI sector. **F** No eGFP- or DsRed-positive cells in the whole brain, verifying that the monosynaptic retrograde tracing strategy is TVA-dependent. Modified RV only infects TVA-positive neurons. Scale bar, 500  $\mu$ m.

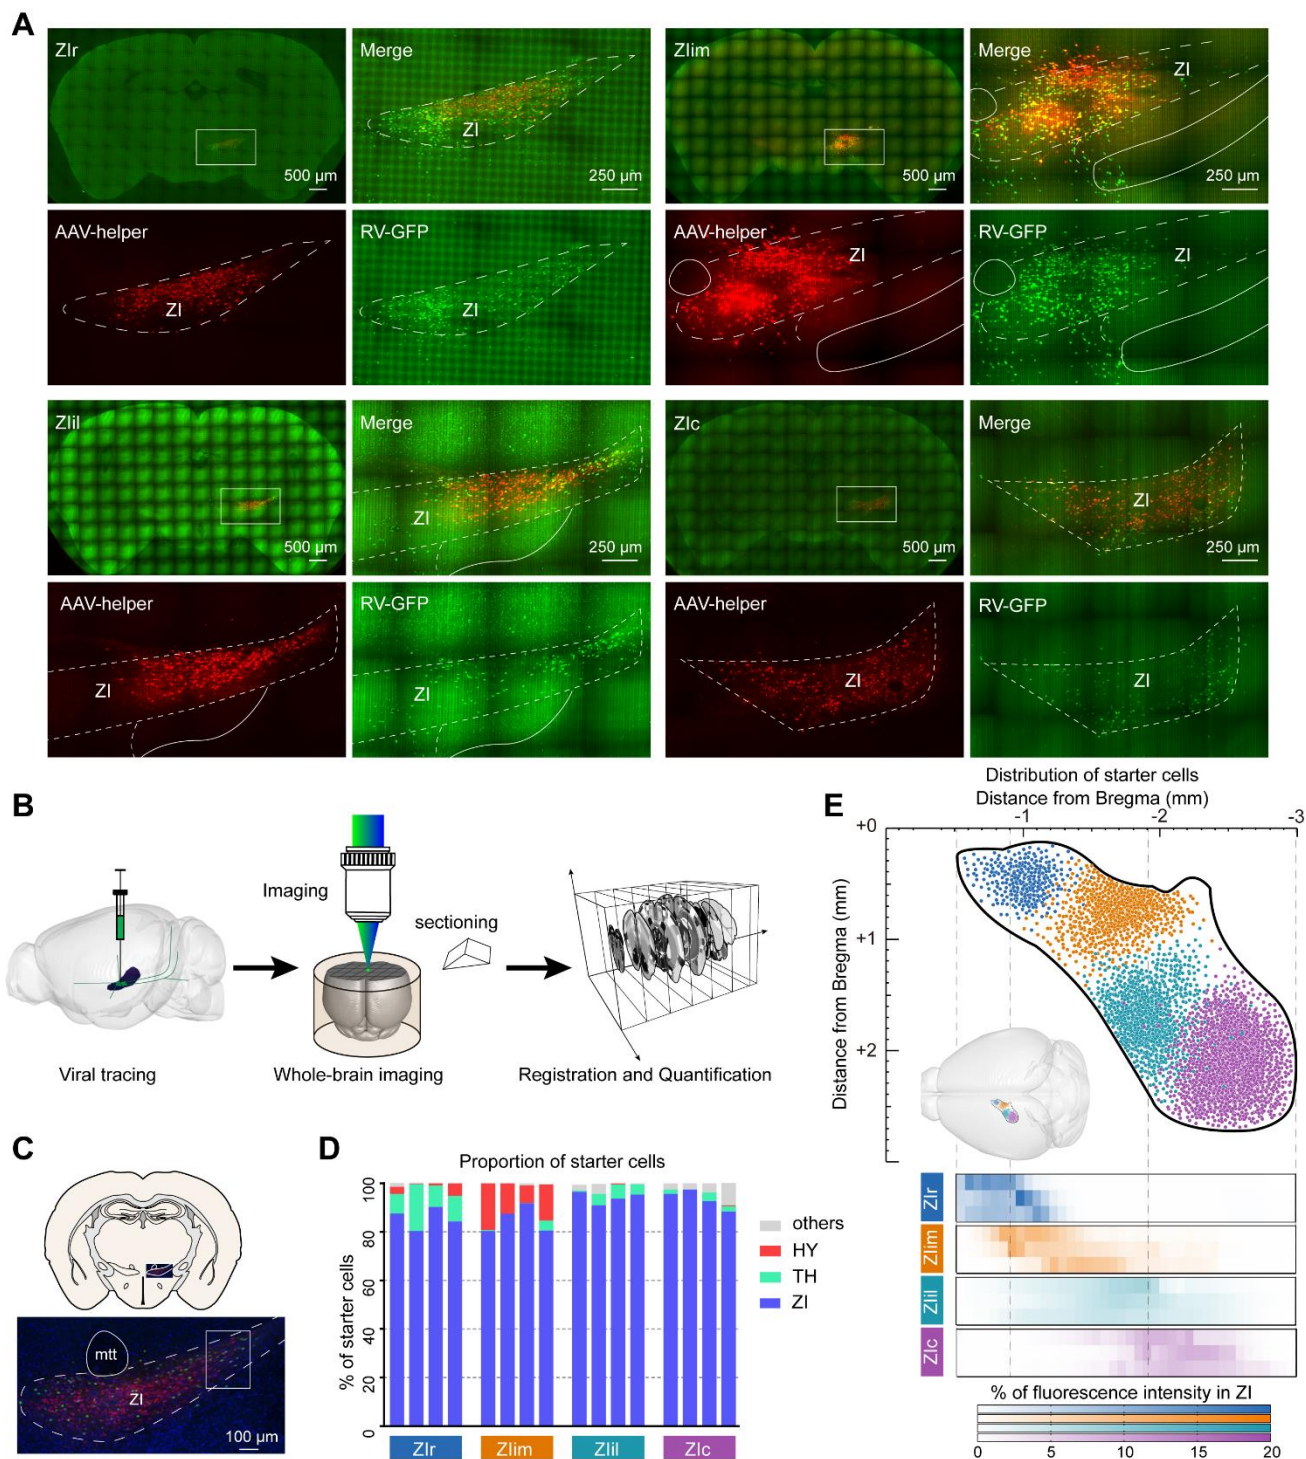

**Fig. S2** Workflow and location of starter cells. **A** Distribution of starter cells in different ZI sectors in the input strategy. Scale bars, 500  $\mu\text{m}$  (inset) and 250  $\mu\text{m}$  (others). **B** Workflow of viral tracing, whole-brain imaging, registration, and quantification. **C** Location of the starter cells in the ZI. **D** Proportions of labeled starter neurons in injection regions (100%, all detected starter cells). Scale bar, 100  $\mu\text{m}$ . **E** Schematic of the top view of anterograde tracing starter cells in distinct ZI sectors and heat map showing the fluorescence intensity distribution in each sample at each specific ZI target (lower panels). The density and brightness of injection regions are too high to distinguish the cell bodies. Since the

fluorescence brightness of neuron cell bodies was much greater than that of efferent axons, the distribution of fluorescence brightness was used to show the distribution of infected neurons in the ZI. Center left insert, visual aid representation the location of the ZI. Every row in each ZI sector is from one sample,  $n = 3$  mice per condition in the anterograde strategy.

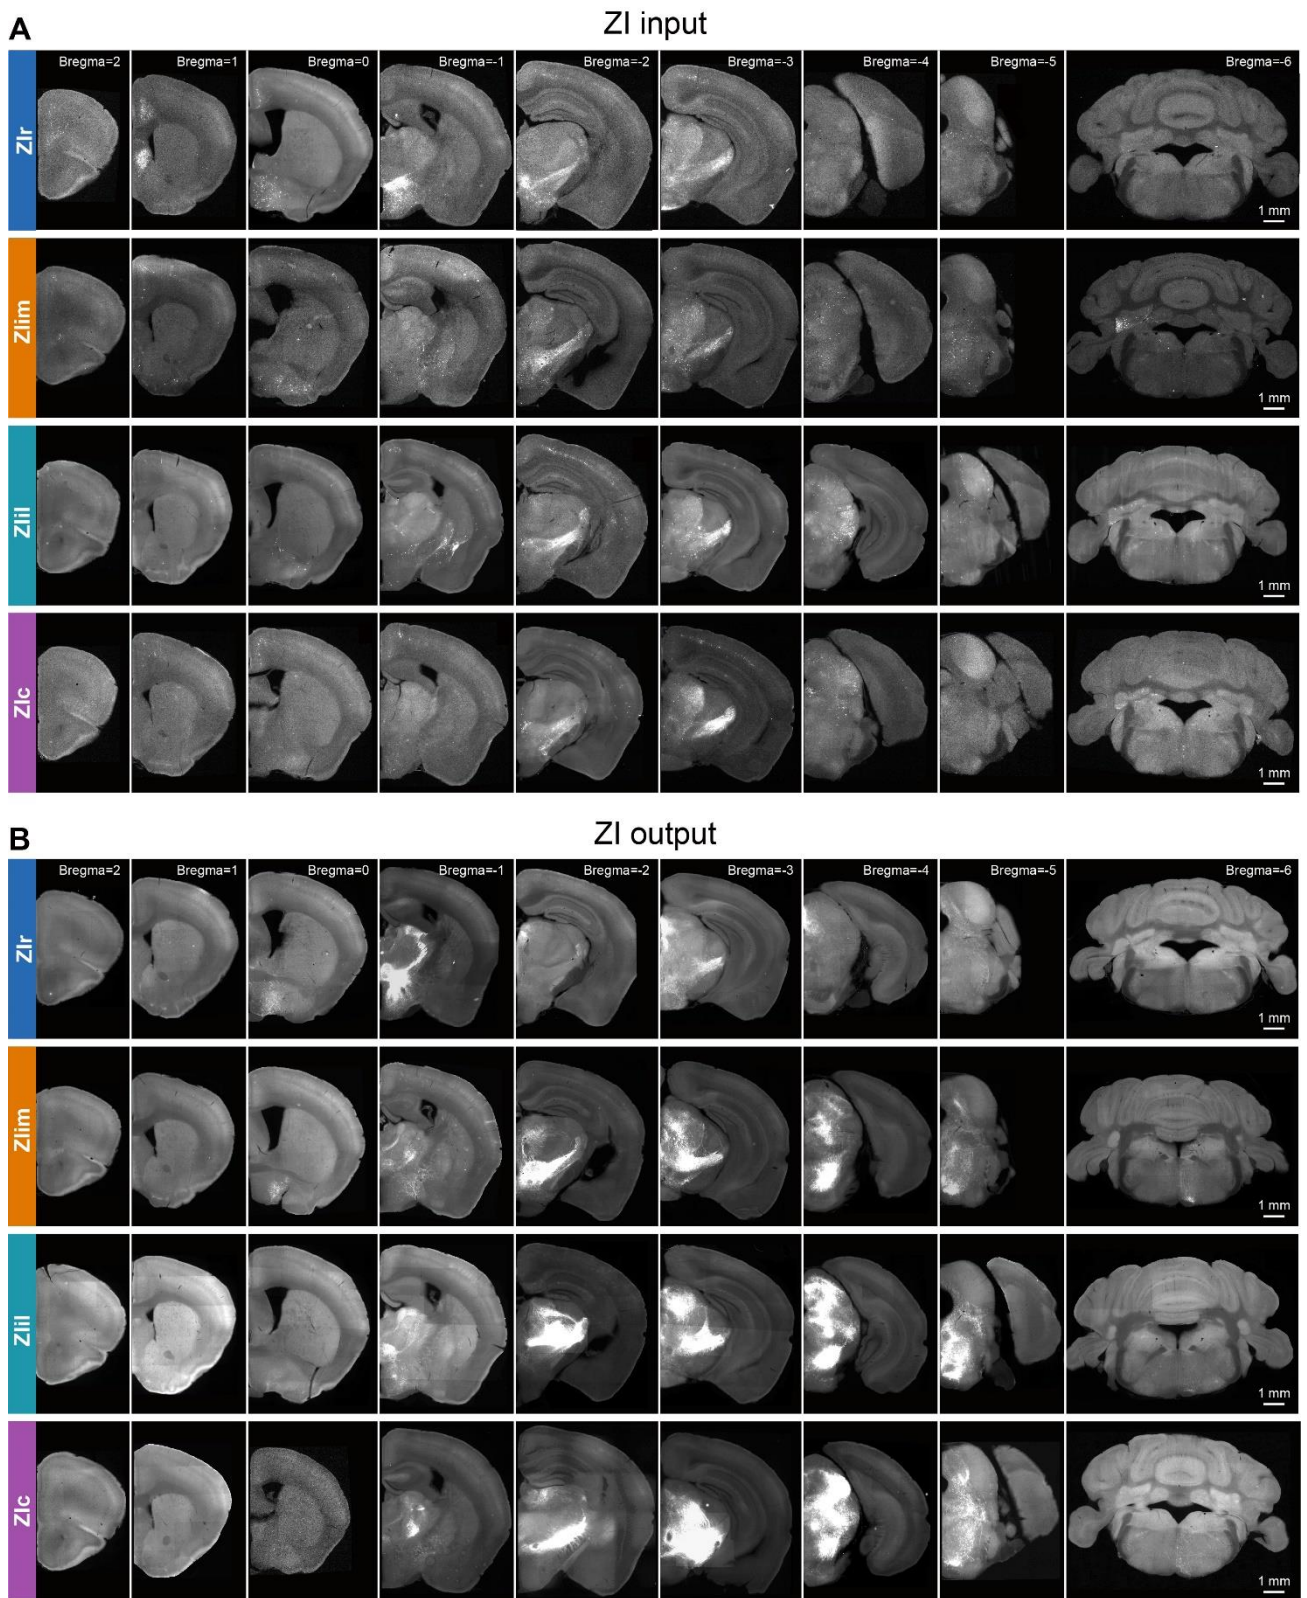

**Fig. S3** Representative images of ZI sector inputs and outputs. **A** Continuous coronal view of ZI sector inputs. **B** Continuous coronal view of ZI sector outputs. Slice thickness, 100  $\mu$ m. Scale bars, 1 mm.

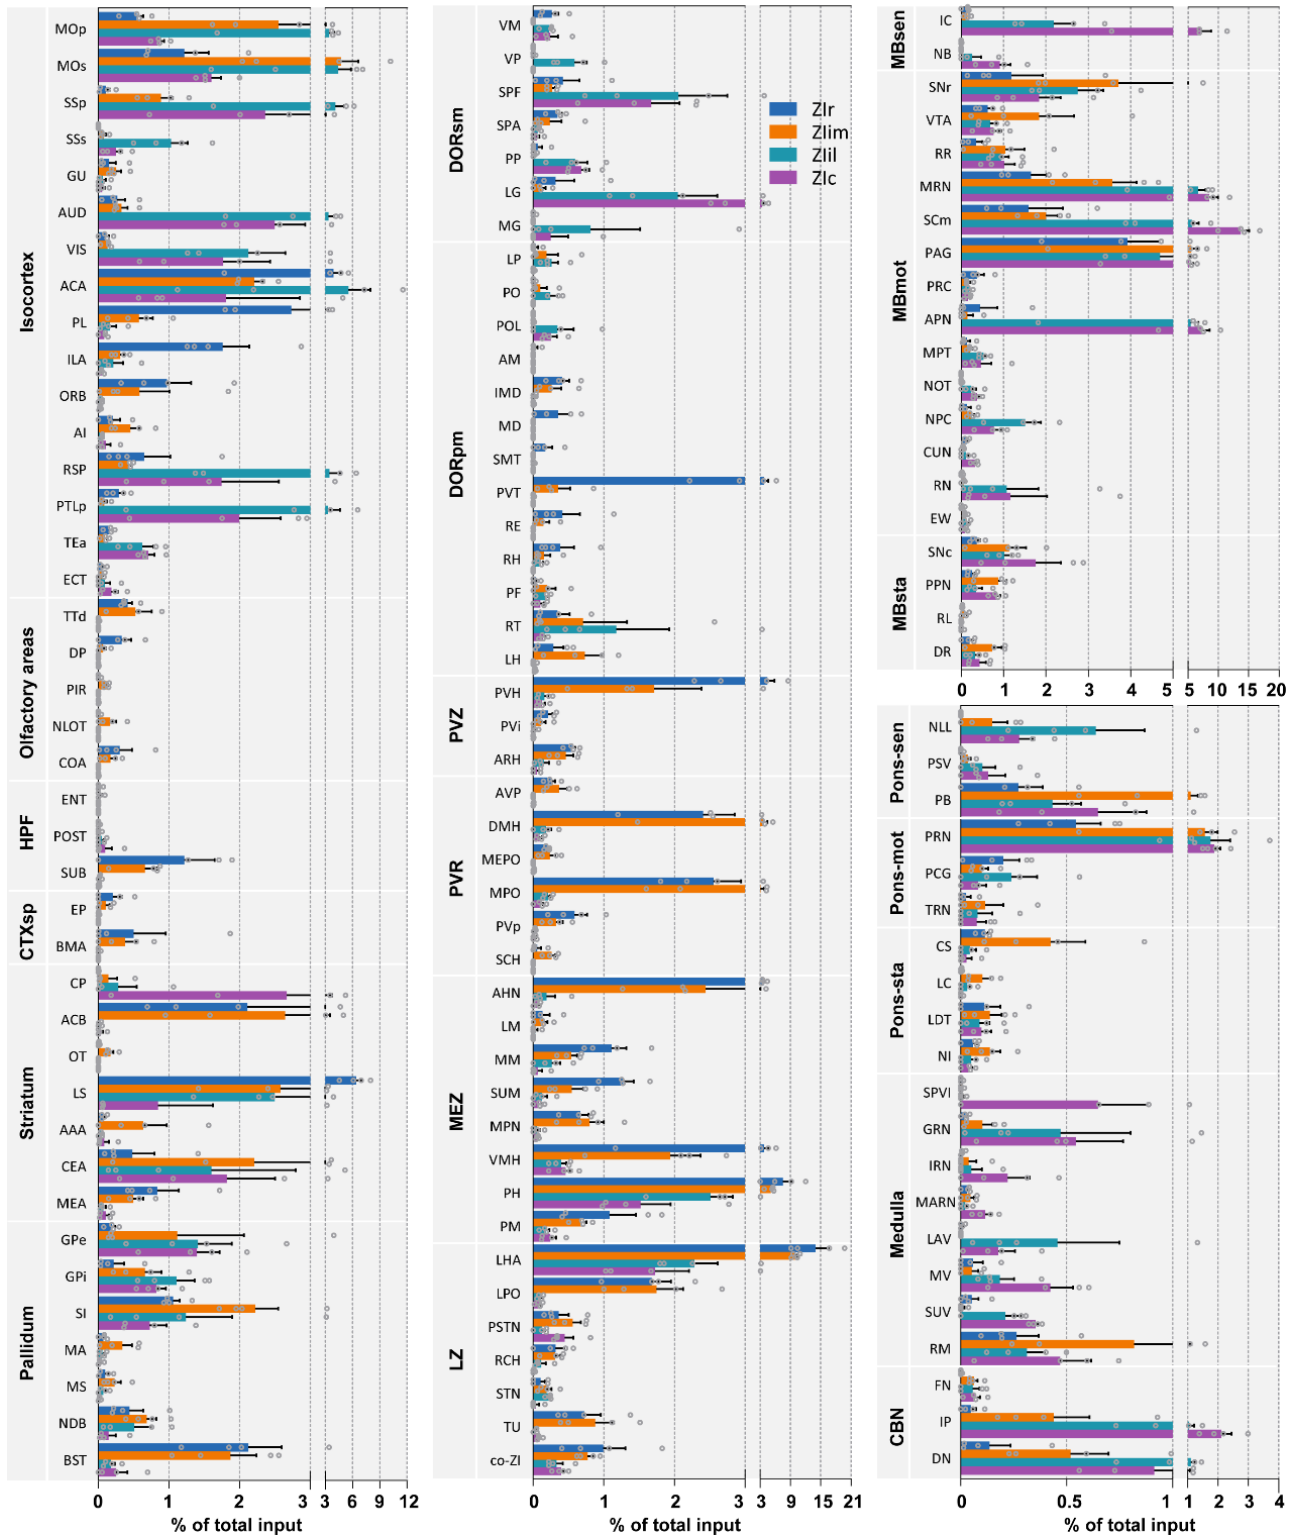

**Fig. S4** Brain-wide input datasets for ZIr, Zlim, ZIil, and ZIc. Whole-brain input regions are divided into 126 subregions for comparison. Values are presented as normalized percentage of total cells (RV). Data shown as the mean  $\pm$  SEM.  $n = 4$  mice per condition.

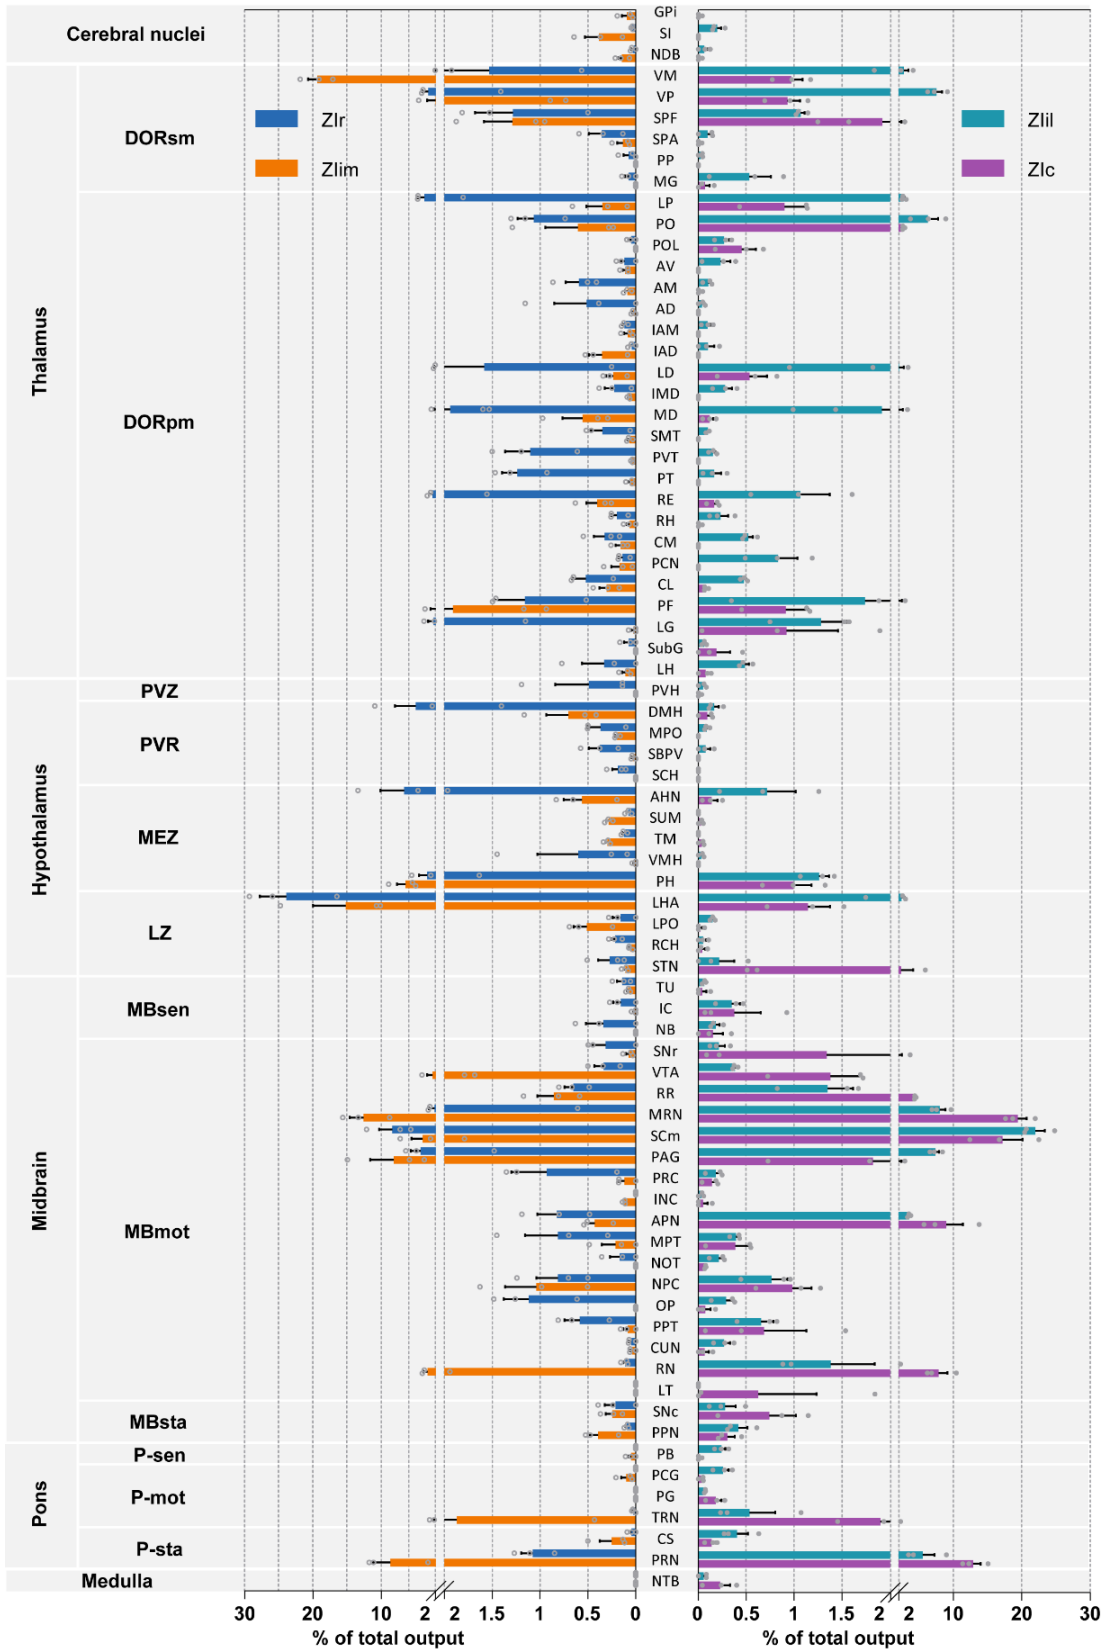

**Fig. S5** Brain-wide output datasets for ZIr, Zlim, ZIil, and ZIc. Whole-brain output regions are divided into 77 subregions for comparison. Values are presented as normalized percentage of total pixels (AAV). Data shown as the mean  $\pm$  SEM.  $n = 3$  mice per condition.

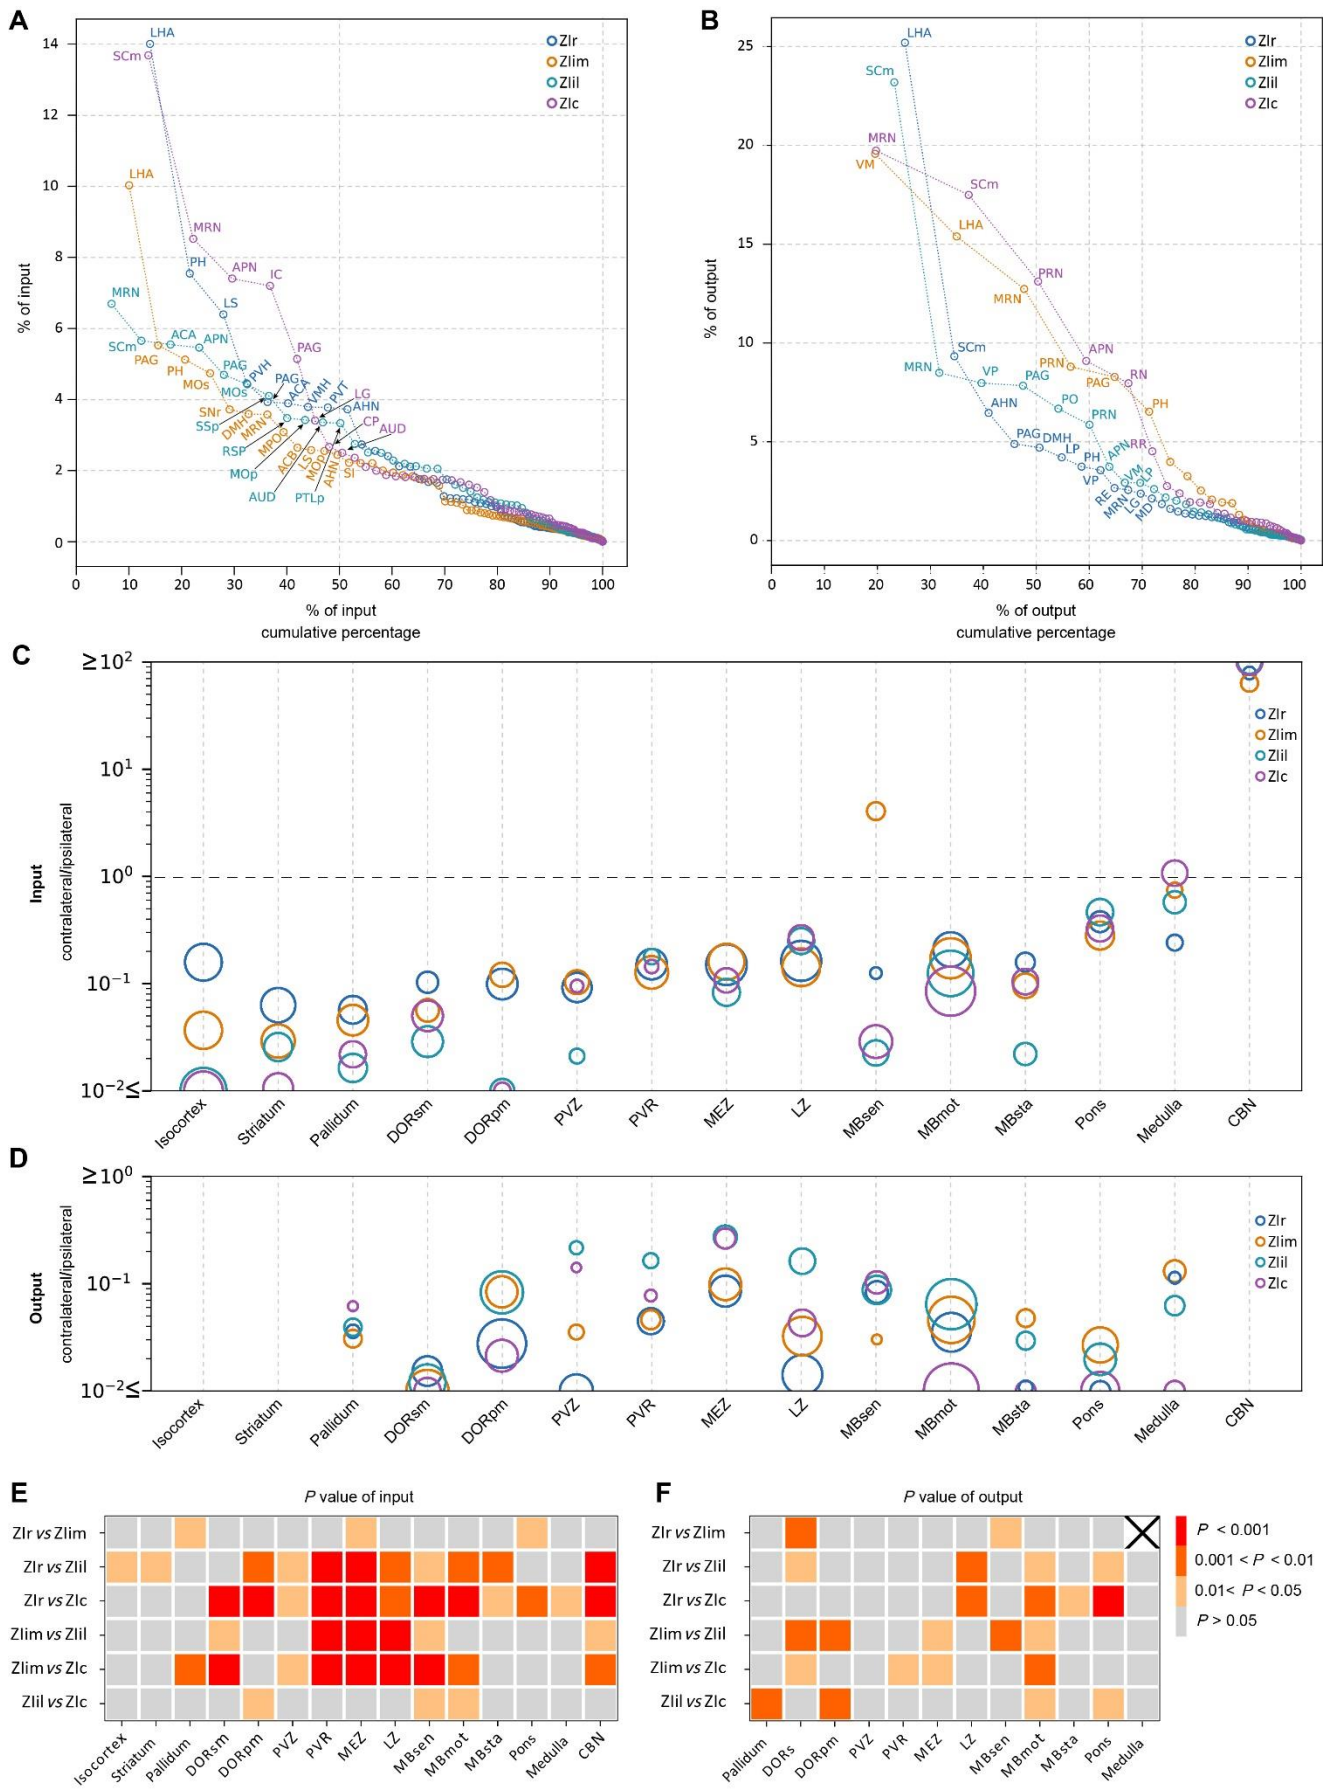

**Fig. S6** Characteristics of ZI connectivity. **A** Cumulative input percentage, in the order of largest to

smallest. **B** Cumulative output percentage, in the order of largest to smallest (horizontal axis, cumulative percentage; vertical axis, average value of input strength of a single region). **C** Ipsilateral and contralateral input ratios. **D** Ipsilateral and contralateral output ratios. Area of a circle indicates strength of connection. **E** Input p-value heat map between the four ZI sectors. **F** Output p-value heat map between the four ZI sectors. Input data,  $n = 4$  mice per condition in **A**, **C**, and **E**. Output data,  $n = 3$  mice per condition in **B**, **D**, and **F**. Colors indicate data from each ZI sector: ZIr, blue; ZLim, orange; ZIil, cyan; ZIc, purple.

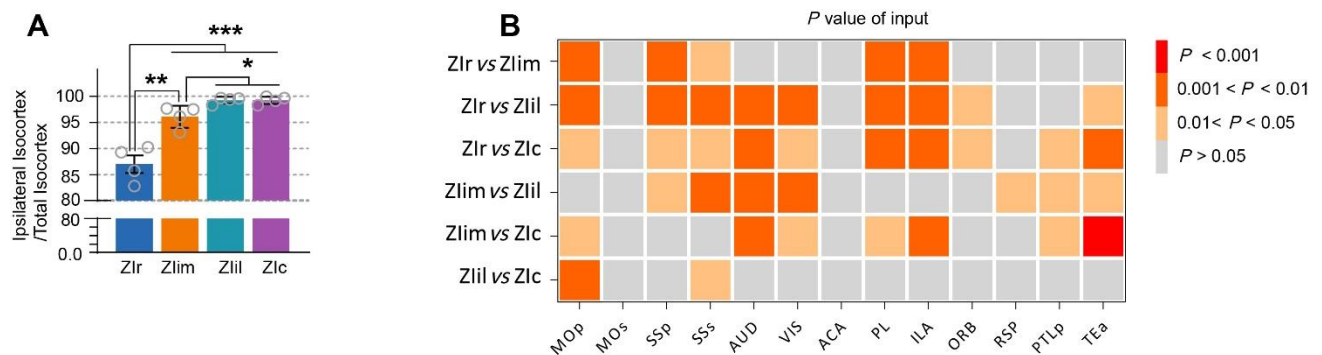

**Fig. S7** Characteristics of isocortex projection to ZI. **A** Ratio of the number of eGFP-positive neurons in ipsilateral isocortex to the number of eGFP-positive neurons in the whole isocortex (100% indicates all cortical eGFP-positive cells). **B** Isocortex input p-value heat map between the four ZI sectors.  $n = 4$  mice per condition in **A** and **B**.



$\mu\text{m}$ ). **E** Thalamic output p-value heat map between the four ZI sectors. **F** Output from ZIi center neuron to the dorsal PO. **G, H** Enlarged view of the area indicated by the rectangle in **F**. **G** distribution of fibers in the PO, **H** distribution of somata in ZI. **I** Outputs from ZIil neurons to the ventral PO. **J, K** enlarged view of the area indicated by the rectangle in **I**. **J** distribution of fibers in the PO, **K** distribution of somata in the ZI.  $n = 4$  mice per condition in **A**.  $n = 3$  mice per condition in **B** and **E**. Slice thickness,  $100 \mu\text{m}$  in **C, D**, and **F–K**. Scale bars,  $500 \mu\text{m}$  (**F, H, I**, and **K**) and  $250 \mu\text{m}$  (**G** and **J**).

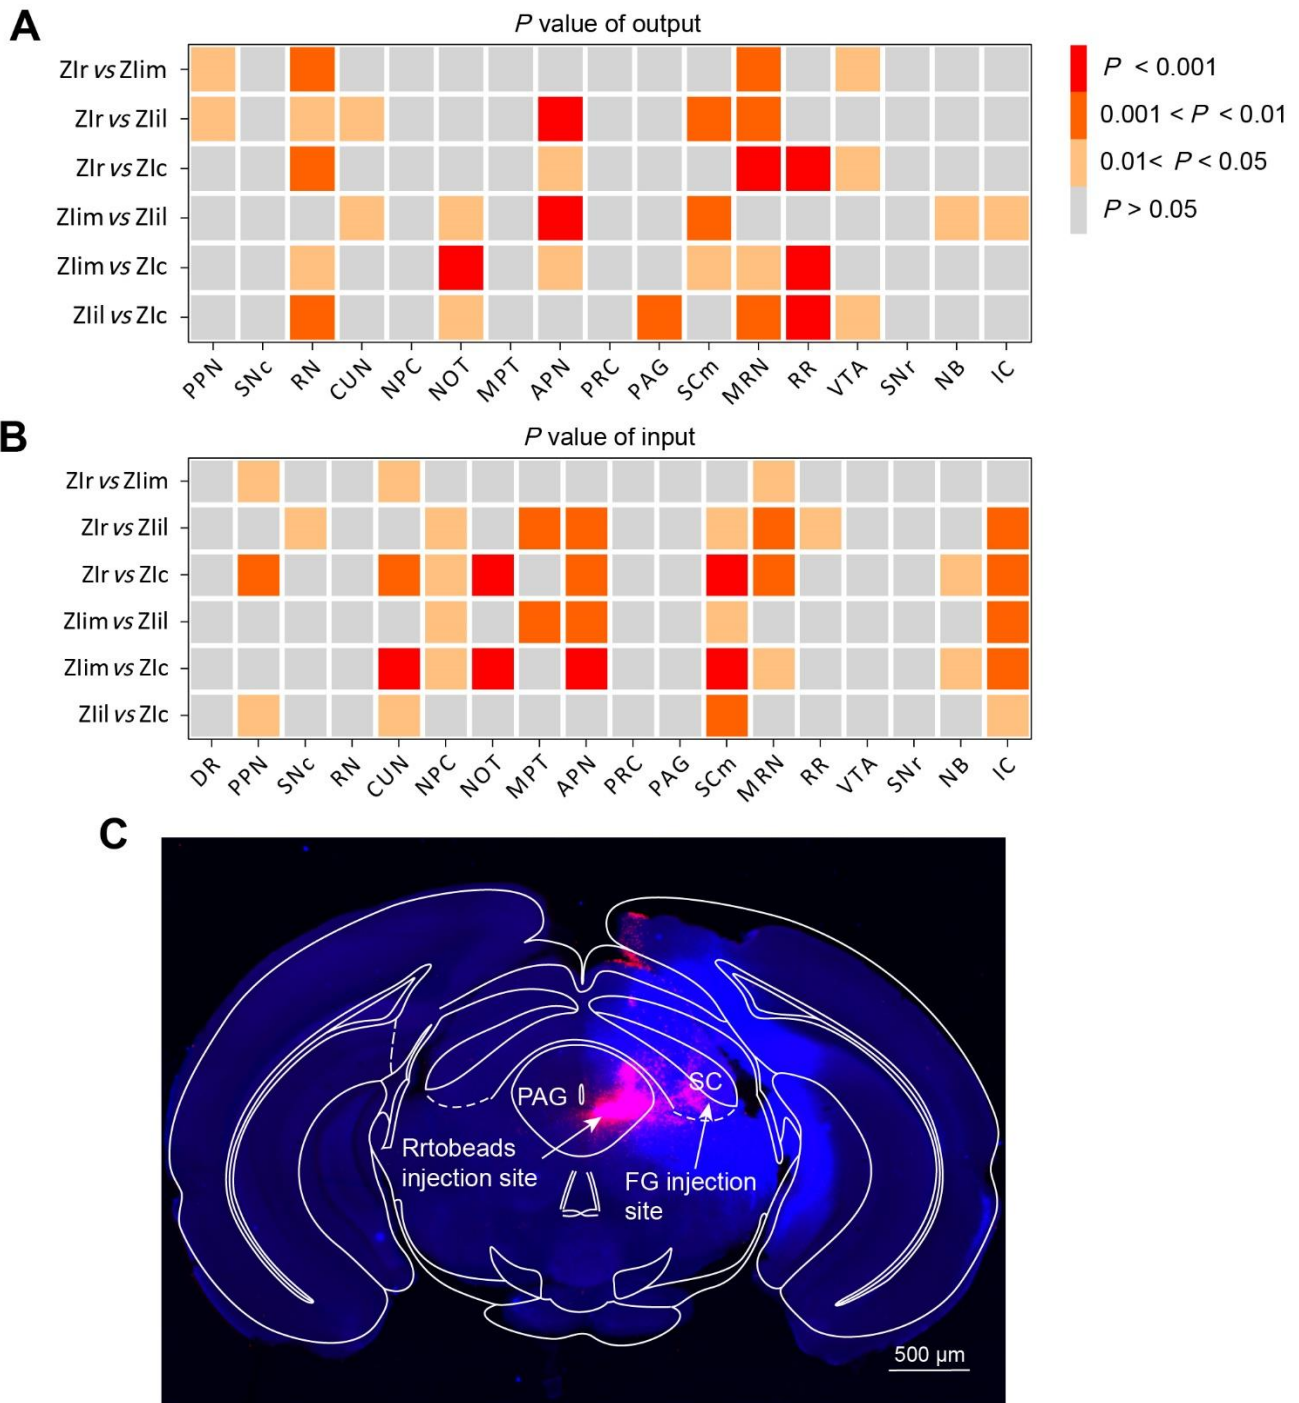

**Fig. S9** Characteristics of connections between ZI and midbrain. **A** Midbrain input p-value heat map between the four ZI sectors ( $n = 3$  mice per condition). **B** Midbrain output p-value heat map between the four ZI sectors ( $n = 4$  mice per condition). **C** Coronal section showing the injection sites of retrobeads and FG. Scale bar, 500  $\mu\text{m}$ .

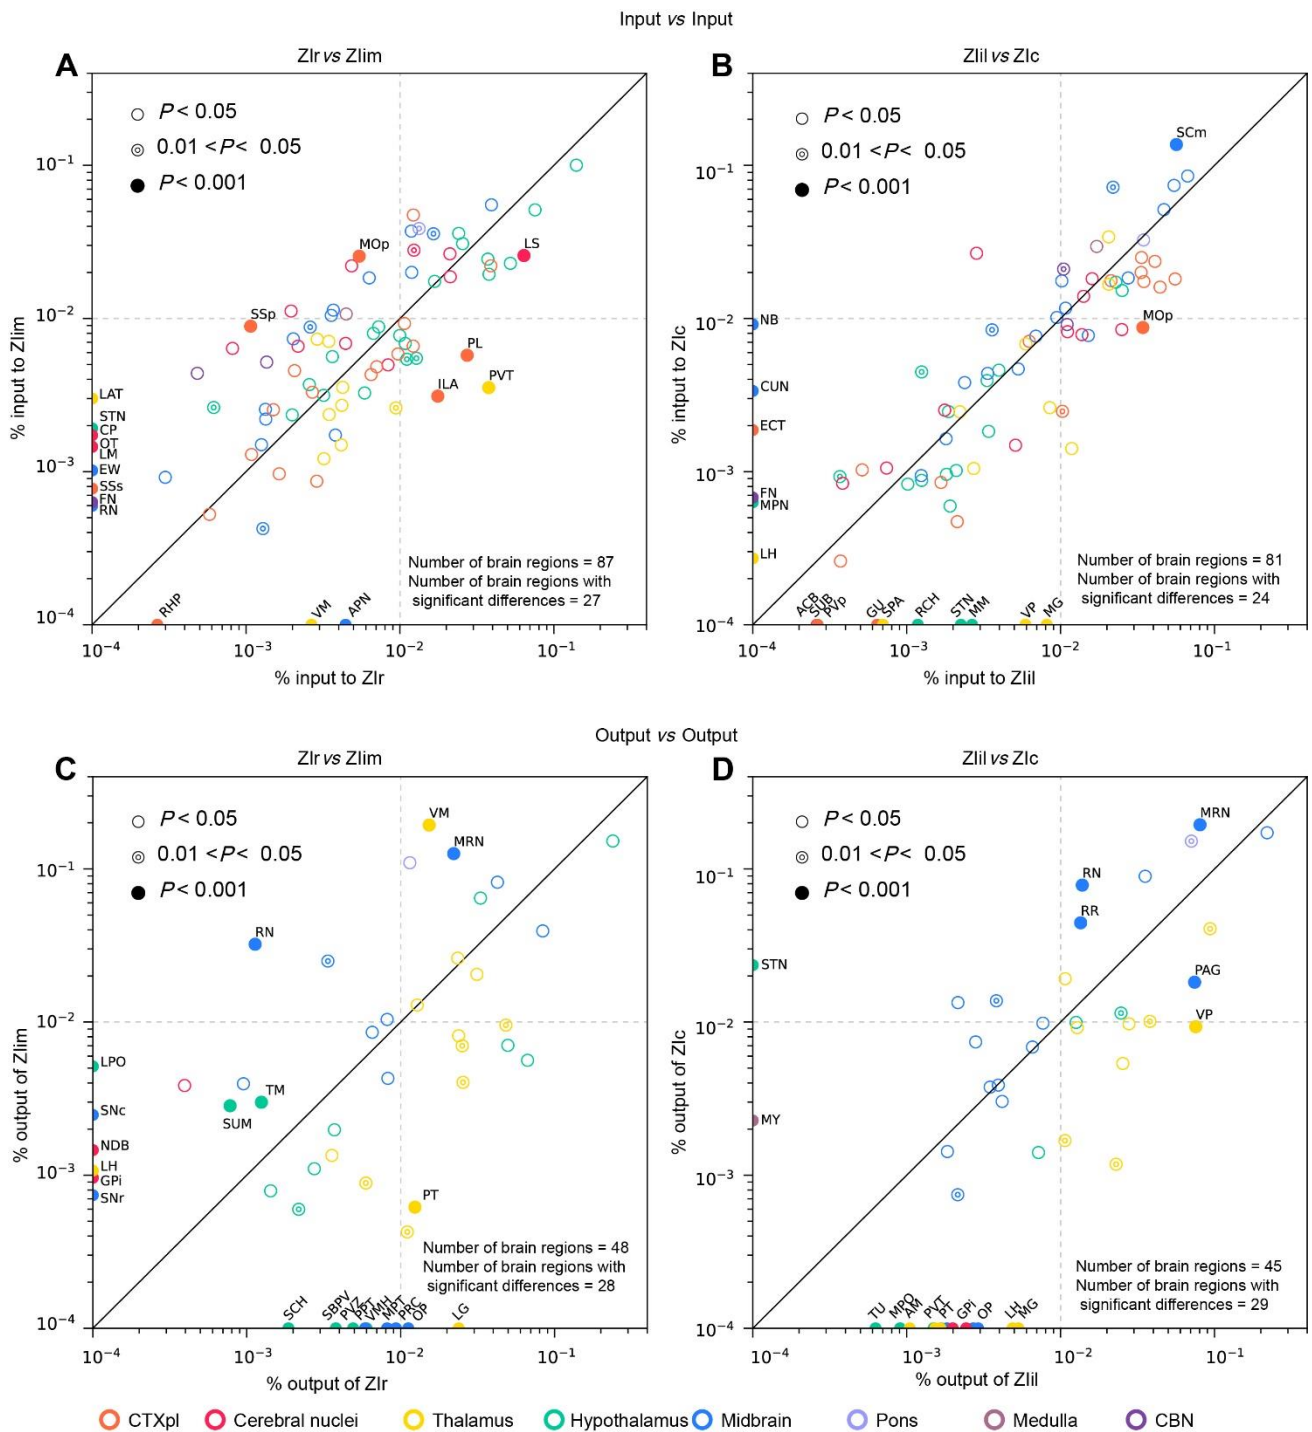

**Fig. S10** Comparison of connection patterns between ZI sectors. **A** Pattern between Zlr input and Zlim input. **B** Pattern between Zlil input and Zlc input. Horizontal and vertical axes represent the average values of the inputs in **A** and **B**. **C** Pattern between Zlr output and Zlim output. **D** Pattern between Zlil output and Zlc output. The color of circles represents the main regions to which these circles belong (see illustration below). Circles (○,  $P > 0.05$ ) indicate no significant difference between inputs and outputs, while concentric circles (◎,  $0.01 < P < 0.05$ ) and solid circles (●,  $P < 0.01$ ) indicate a statistical difference between inputs and outputs. Lower right, number of regions and the number of regions with

significant differences between ZI sectors. Points on the horizontal axis represent regions with very little output (<0.03%), and points on the vertical axis represent regions with very little input (<0.03%). The difference in outputs between ZIr and ZLim is larger than the inputs; similarly for ZIil and ZIc.

### Abbreviations

---

|       |                                         |     |                                                    |
|-------|-----------------------------------------|-----|----------------------------------------------------|
| AAA   | Anterior amygdala area                  | MS  | Medial septal nucleus                              |
| ACA   | Anterior cingulate area                 | MV  | Medial vestibular nucleus                          |
| ACB   | Nucleus accumbens                       | NB  | Nucleus of the brachium of the inferior colliculus |
| AD    | Anterodorsal nucleus                    | NDB | Diagonal band nucleus                              |
| AHN   | Anterior hypothalamic nucleus           | NI  | Nucleus insertus                                   |
| AI    | Agranular insular area                  | NLL | Nucleus of the lateral lemniscus                   |
| AM    | Anteromedial nucleus                    | NOT | Nucleus of the optic tract                         |
| APN   | Anterior pretectal nucleus              |     | Nucleus of the posterior commissure                |
| ARH   | Arcuate hypothalamus nucleus            | NTB | Nucleus of the trigeminal body                     |
| AUD   | Auditory areas                          | OP  | Olivary pretectal nucleus                          |
| AV    | Anteroventral nucleus of thalamus       | ORB | Orbital area                                       |
| AVP   | Anteroventral periventricular nucleus   | OT  | Olfactory tubercle                                 |
| BMA   | Basomedial amygdala nucleus             | PAG | Periaqueductal gray                                |
| BST   | Bed nuclei of the stria terminalis      | PB  | Parabrachial nucleus                               |
| CBN   | Cerebellar nuclei                       | PCG | Pontine central gray                               |
| CEA   | Central amygdala nucleus                | PCN | Paracentral nucleus                                |
| CL    | Central lateral nucleus of the thalamus | PF  | Parafascicular nucleus                             |
| CM    | Central medial nucleus of the thalamus  | PG  | Pontine gray                                       |
| CP    | Caudatoputamen                          | PH  | Posterior hypothalamic nucleus                     |
| CS    | Superior central nucleus raphe          | PL  | Prelimbic area                                     |
| CTXpl | Cortical plate                          | PM  | Premammillary nucleus                              |

|       |                                                           |      |                                                                        |
|-------|-----------------------------------------------------------|------|------------------------------------------------------------------------|
| CTXsp | Cortical subplate                                         | PO   | Posterior complex of the thalamus<br>Posterior limiting nucleus of the |
| CUN   | Cuneiform nucleus<br>Dorsomedial nucleus of the           | POL  | thalamus                                                               |
| DMH   | hypothalamus                                              | POST | Postsubiculum                                                          |
| DN    | Dentate nucleus<br>Thalamus, polymodal association        | PP   | Peripeduncular nucleus                                                 |
| DORpm | cortex related<br>Thalamus, sensory-motor cortex          | PPN  | Pedunculopontine nucleus                                               |
| DORsm | related                                                   | PPT  | Posterior pretectal nucleus                                            |
| DR    | Dorsal raphe nucleus                                      | PRC  | Precommissural nucleus                                                 |
| ECT   | Ectorhinal area                                           | PRN  | Pontine reticular nucleus                                              |
| ENT   | Entorhinal area                                           | PSTN | Parasubthalamic nucleus<br>Principal sensory nucleus of the            |
| EP    | Endopiriform nucleus                                      | PSV  | trigeminal                                                             |
| EW    | Edinger-Westphal nucleus                                  | PT   | Parataenial nucleus                                                    |
| FN    | Fastigial nucleus<br>Globus pallidus, external            | PTLp | Posterior parietal association areas<br>Parventricular hypothalamic    |
| GPe   | segment<br>Globus pallidus, internal                      | PVH  | nucleus<br>Periventricular hypothalamic                                |
| GPi   | segment                                                   | PVi  | nucleus, intermediate part                                             |
| GRN   | Gigantocellular reticular nucleus                         | PVp  | Periventricular hypothalamic<br>nucleus, posterior part                |
| GU    | Gustatory area                                            | PVR  | Periventricular region<br>Paraventricular nucleus of the               |
| HPF   | Hippocampal formation<br>Interanterodorsal nucleus of the | PVT  | thalamus                                                               |
| IAD   | thalamus<br>Interanteromedial nucleus of the              | PVZ  | Periventricular zone                                                   |
| IAM   | thalamus                                                  | RCH  | Retrochiasmatic area                                                   |
| IC    | Inferior colliculus                                       | RE   | Nucleus reuniens                                                       |
| ILA   | Infralimbic area                                          | RH   | Rhomboid nucleus                                                       |

|       |                                                       |      |                                                   |
|-------|-------------------------------------------------------|------|---------------------------------------------------|
|       | Intermediodorsal nucleus of the                       |      |                                                   |
| IMD   | thalamus                                              | RHP  | Retrohippocampal region                           |
| INC   | Interstitial nucleus of Cajal                         | RL   | Rostral linear nucleus raphe                      |
| IP    | Interposed nucleus                                    | RM   | Nucleus raphe magnus                              |
| IRN   | Intermediate reticular nucleus                        | RN   | Red nucleus<br>Midbrain reticular nucleus,        |
| LAT   | Lateral group of dorsal thalamus                      | RR   | retrobulbar area                                  |
| LAV   | Lateral vestibular nucleus                            | RSP  | Retrosplenial area                                |
| LC    | Locus ceruleus                                        | RT   | reticular nuclei of dorsal thalamus               |
| LD    | Lateral dorsal nucleus of thalamus                    | SBPV | Subparaventricular zone                           |
| LDT   | Laterodorsal tegmental nucleus                        | SCH  | Subrachiasmatic nucleus                           |
| LG    | Lateral geniculate complex                            | SCm  | Superior colliculus, motor related                |
| LHb   | Lateral habenula                                      | SI   | Substantia innominata                             |
| LHA   | Lateral hypothalamic area                             | SMT  | Submedial nucleus of the thalamus                 |
| LM    | Lateral mammillary nucleus                            | SNc  | Substantia nigra, pars compacta                   |
| LP    | Lateral posterior nucleus of the thalamus             | SNr  | Substantia nigra, pars reticulata                 |
| LPO   | Lateral preoptic area                                 | SPA  | Subparafascicular area                            |
| LS    | Lateral septal nucleus                                | SPF  | Subparafascicular nucleus                         |
| LT    | Lateral terminal nucleus of the accessory optic tract | SPVI | Spinal nucleus of the trigeminal, interpolar part |
| LZ    | Hypothalamus lateral zone                             | SSp  | Primary somatosensory areas                       |
| MA    | Magnocellular nucleus                                 | SSs  | Supplemental somatosensory area                   |
| MARN  | Magnocellular reticular nucleus                       | STN  | Subthalamic nucleus                               |
| MBmot | Midbrain, motor related                               | SUB  | Subiculum                                         |
| MBsen | Midbrain, sensory related                             | SubG | Subgeniculate nucleus                             |
| MBsta | Midbrain, behavior related                            | SUM  | Supramammillary nucleus                           |
| MD    | Mediodorsal nucleus of the thalamus                   | SUV  | Superior vestibular nucleus                       |
| MEA   | Medial amygdala nucleus                               | TEa  | Temporal association areas                        |
| MEPO  | Median preoptic nucleus                               | TM   | Tuberomammillary nucleus                          |
| MEZ   | Hypothalamus medial zone                              | TRN  | Tegmental reticular nucleus                       |

|     |                            |       |                                           |
|-----|----------------------------|-------|-------------------------------------------|
| MG  | Medial geniculate complex  | TU    | Tuberal nucleus                           |
| MM  | Medial mammillary nucleus  | VIS   | Visual areas                              |
| MOp | Primary motor area         | VM    | Ventral medial nucleus of the thalamus    |
| MOs | Secondary motor area       | VMH   | Ventromedial hypothalamic nucleus         |
| MPN | Medial preoptic nucleus    | VP    | Ventral posterior complex of the thalamus |
| MPO | Medial preoptic area       | VTA   | Ventral tegmental area                    |
| MPT | Medial pretectal area      | ZI    | Zona incerta                              |
| MRN | Midbrain reticular nucleus | co-ZI | Contralateral ZI                          |

---
